# Supplementary material
Source: PubMed Central journal article supplement (PMC8339877)
Supplement: NIHMS1718244-supplement-Supplementary_files.pdf [file NIHMS1718244-supplement-Supplementary_files.pdf]

## Supplementary Material

## Amnestic AD

### Phenotype<sup>1</sup>

Progressive amnestic syndrome of the 'hippocampal type'

### Main neurodegenerative differential diagnoses (rare)<sup>6</sup>

- LATE
- PART
- FTLD-Tau (AGD)
- Atypical FTLD-Tau or TDP (17q21.31, MAPT, GRN, C9ORF72 mutations or GGT)
- Atypical LBD
- Atypical CTE
- Prion-associated diseases

## Posterior Cortical Atrophy

### Phenotype<sup>2</sup>

Progressive disturbance of visual ± other posterior cognitive functions

### Main neurodegenerative differential diagnoses (rare)<sup>6</sup>

- LBD
- FTLD-Tau (CBD)
- Prion-associated diseases

## Logopenic variant PPA

### Phenotype<sup>3</sup>

Progressive impairment in single-word retrieval and in repetition of sentences

### Main neurodegenerative differential diagnoses (rare)<sup>6</sup>

- FTLD-Tau (CBD) or TDP
- Atypical LBD
- Prion-associated diseases

## Behavioural-dysexecutive variant

### Phenotype<sup>4</sup>

- Progressive apathy or behavioural disinhibition and stereotyped behaviours  
- or progressive predominant executive dysfunction

### Main neurodegenerative differential diagnoses (frequent)<sup>6</sup>

- Behavioural AD: FTLD-Tau, TDP or FUS
- Dysexecutive AD: FTLD, LBD, Parkinson's disease, PSP, CBD, Huntington's disease...

## Cortico-basal Syndrome

### Phenotype<sup>5</sup>

Progressive asymmetric clinical presentation including limb rigidity or akinesia, limb dystonia, limb myoclonus, orobuccal or limb apraxia, cortical sensory deficit, alien limb phenomena

### Main neurodegenerative differential diagnoses (frequent)<sup>6</sup>

- FTLD-Tau (CBD, PSP)
- FTLD-TDP
- Atypical LBD

## Other variants of PPA

### Phenotype<sup>3</sup>

Semantic or non fluent variants PPA

### Main neurodegenerative differential diagnoses (frequent)<sup>6</sup>

- FTLD-Tau or TDP or FUS
- Atypical LBD
- Prion-associated diseases

Common AD phenotypes

Uncommon AD phenotypes

## Figure caption

Supplementary Figure. Common and uncommon clinical phenotypes of Alzheimer's disease (AD) and the relative frequency of differential diagnoses for each phenotype (including only neurodegenerative diseases). Common phenotypes are phenotypes where AD is a common underlying pathology, while uncommon phenotypes are phenotypes where AD is not the most frequent underlying pathology. LATE = limbic-predominant age-related TDP-43 encephalopathy; PART = primary age-related tauopathy; AGD = argyrophilic grain disease; FTLD = frontotemporal lobar degeneration; LBD = Lewy body disease; CTE = chronic traumatic encephalopathy; PRNP = PRioN protein; CBD = cortico-basal degeneration; TDP = TAR DNA-binding protein; FUS = fused in sarcoma; PSP = progressive supranuclear palsy; PPA = primary progressive aphasia'

## Supplementary Figure - References

- 1 Dubois B, Feldman HH, Jacova C, *et al.* Advancing research diagnostic criteria for Alzheimer's disease: The IWG-2 criteria. *Lancet Neurol* 2014; **13**: 614–29.
- 2 Crutch SJ, Schott JM, Rabinovici GD, *et al.* Consensus classification of posterior cortical atrophy. *Alzheimer's Dement* 2017; **13**: 870–84.
- 3 Gorno-Tempini ML, Hillis AE, Weintraub S, *et al.* Classification of primary progressive aphasia and its variants. *Neurology* 2011; **76**: 1006–14.
- 4 Ossenkoppele R, Pijnenburg YAL, Perry DC, *et al.* The behavioural/dysexecutive variant of Alzheimer's disease: clinical, neuroimaging and pathological features. *Brain* 2015; **138**: 2732–49.
- 5 Armstrong MJ, Litvan I, Lang AE, *et al.* Criteria for the diagnosis of corticobasal degeneration. *Neurology* 2013; **80**: 496–503.
- 6 Villain N, Dubois B. Alzheimer's Disease Including Focal Presentations. *Semin Neurol* 2019; **39**: 213–26.

Supplementary references – Panel 3

- 1 Leonenko G, Shoai M, Bellou E, *et al.* Genetic risk for alzheimer disease is distinct from genetic risk for amyloid deposition. *Ann Neurol* 2019; **86**: 427–35.
- 2 Porter T, Burnham SC, Milicic L, *et al.* Utility of an Alzheimer’s Disease Risk-Weighted Polygenic Risk Score for Predicting Rates of Cognitive Decline in Preclinical Alzheimer’s Disease: A Prospective Longitudinal Study. *J Alzheimer’s Dis* 2018; **66**: 1193–211.
- 3 Carvalho DZ, St Louis EK, Knopman DS, *et al.* Association of excessive daytime sleepiness with longitudinal  $\beta$ -Amyloid accumulation in elderly persons without dementia. *JAMA Neurol* 2018; **75**: 672–80.
- 4 Gatchel JR, Rabin JS, Buckley RF, *et al.* Longitudinal Association of Depression Symptoms with Cognition and Cortical Amyloid among Community-Dwelling Older Adults. *JAMA Netw Open* 2019; **2**: 1–13.
- 5 Biddle KD, d’Oleire Uquillas F, Jacobs HIL, *et al.* Social Engagement and Amyloid- $\beta$ -Related Cognitive Decline in Cognitively Normal Older Adults. *Am J Geriatr Psychiatry* 2019; **27**: 1247–56.
- 6 Rabin JS, Klein H, Kirn DR, *et al.* Associations of Physical Activity and  $\beta$ -Amyloid with Longitudinal Cognition and Neurodegeneration in Clinically Normal Older Adults. *JAMA Neurol* 2019; **76**: 1203–10.
- 7 Burnham SC, Bourgeat P, Doré V, *et al.* Clinical and cognitive trajectories in cognitively healthy elderly individuals with suspected non-Alzheimer’s disease pathophysiology (SNAP) or Alzheimer’s disease pathology: a longitudinal study. *Lancet Neurol* 2016; **15**: 1044–53.
- 8 Lim YY, Kalinowski P, Pietrzak RH, *et al.* Association of  $\beta$ -Amyloid and apolipoprotein e e4 with memory decline in preclinical Alzheimer disease. *JAMA Neurol* 2018; **75**: 488–94.
- 9 Dubois B, Epelbaum S, Nyasse F, *et al.* Cognitive and neuroimaging features and brain  $\beta$ -amyloidosis in individuals at risk of Alzheimer’s disease (INSIGHT-preAD): a longitudinal observational study. *Lancet Neurol* 2018; **17**: 335–46.
- 10 Albert M, Zhu Y, Moghekar A, *et al.* Predicting progression from normal cognition to mild cognitive impairment for individuals at 5 years. *Brain* 2018; **141**: 877–87.
- 11 Jack CR, Wiste HJ, Therneau TM, *et al.* Associations of Amyloid, Tau, and Neurodegeneration Biomarker Profiles with Rates of Memory Decline among Individuals Without Dementia. *JAMA - J Am Med Assoc* 2019; **55905**: 2316–25.
- 12 Monsell SE, Mock C, Roe CM, *et al.* Comparison of symptomatic and asymptomatic persons with Alzheimer disease neuropathology. *Neurology* 2013; **80**: 2121–9.
- 13 Nelson PT, Dickson DW, Trojanowski JQ, *et al.* Limbic-predominant age-related TDP-43 encephalopathy (LATE): Consensus working group report. *Brain* 2019; **142**: 1503–27.

- 14 Ebenau J, Timmers T, Wesselman LMP, *et al.* ATN-classification and clinical progression in subjective cognitive decline: the SCIENCE project. *Neurology* 2020.
- 15 Vogel JW, Doležalová MV, La Joie R, *et al.* Subjective cognitive decline and  $\beta$ -amyloid burden predict cognitive change in healthy elderly. *Neurology* 2017; **89**: 2002–9.
- 16 Buckley RF, Mormino EC, Amariglio RE, *et al.* Sex, amyloid, and APOE  $\epsilon$ 4 and risk of cognitive decline in preclinical Alzheimer’s disease: Findings from three well-characterized cohorts. *Alzheimer’s Dement* 2018; **14**: 1193–203.
- 17 Amariglio RE, Buckley RF, Mormino EC, *et al.* Amyloid-associated increases in longitudinal report of subjective cognitive complaints. *Alzheimer’s Dement Transl Res Clin Interv* 2018; **4**: 444–9.
- 18 Wallace LMK, Theou O, Godin J, Andrew MK, Bennett DA, Rockwood K. Investigation of frailty as a moderator of the relationship between neuropathology and dementia in Alzheimer’s disease: a cross-sectional analysis of data from the Rush Memory and Aging Project. *Lancet Neurol* 2019; **18**: 177–84.
